# Supplementary material for: The impact of “early” versus “late” initiation of renal replacement therapy in critical care patients with acute kidney injury: a systematic review and evidence synthesis
Source: PubMed Central journal article supplement (PMC4858821; doi:10.1186/s13054-016-1291-8), 2016-05-06
Supplement: 13054_2016_1291_MOESM3_ESM.pdf [file 13054_2016_1291_MOESM3_ESM.pdf]

## Supplementary Index

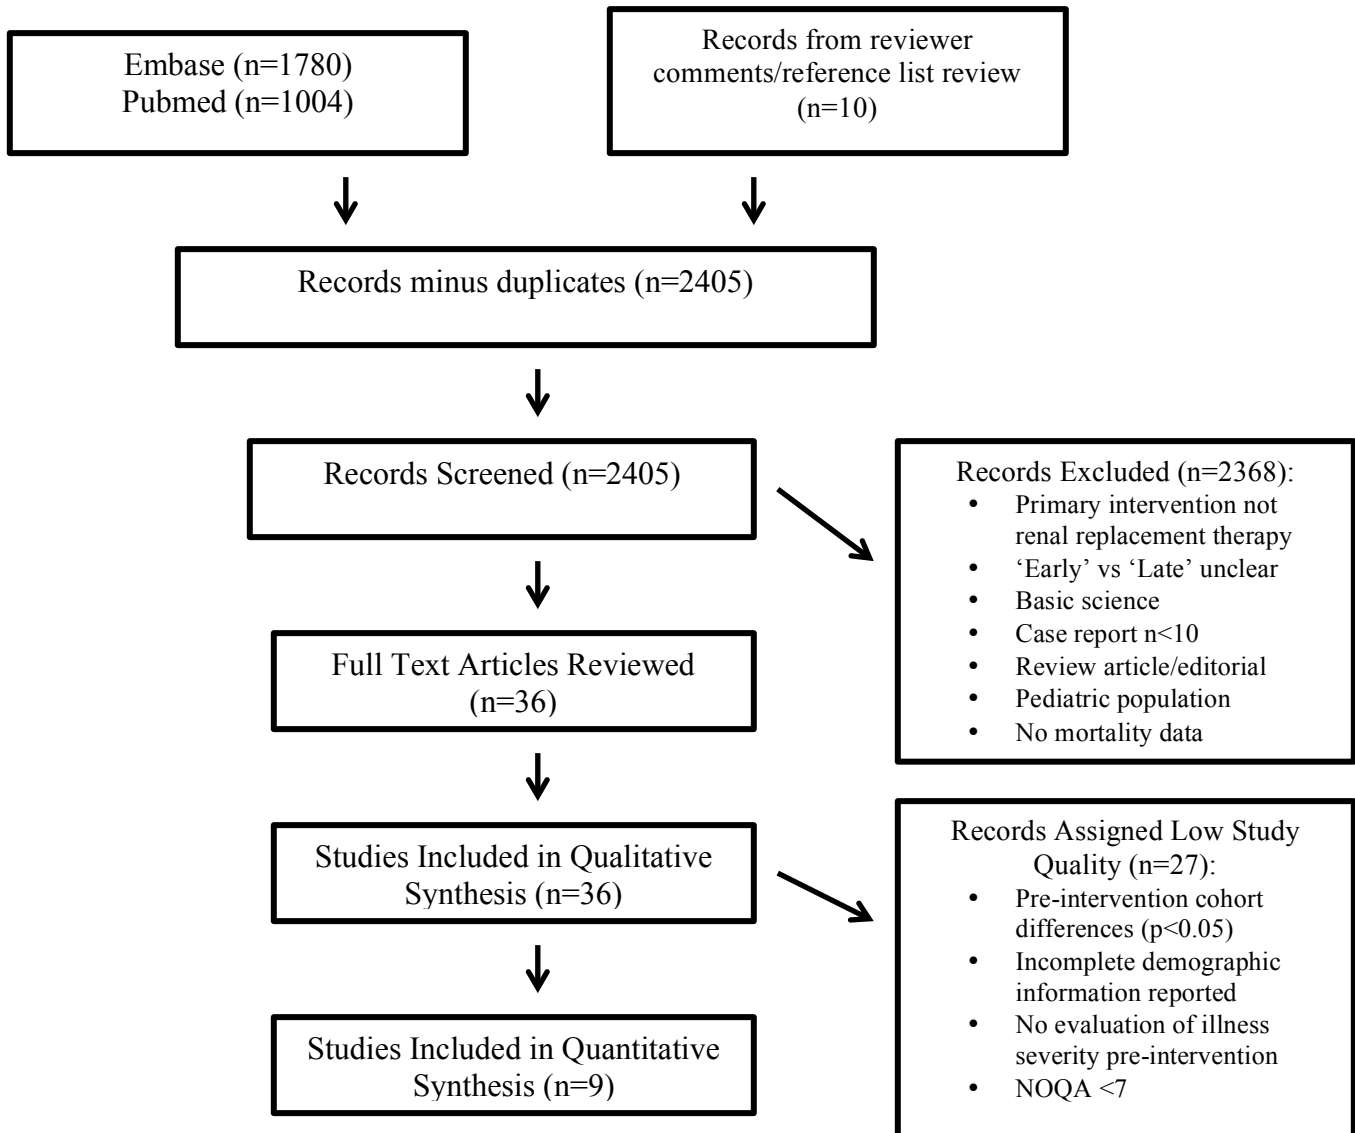

Figure 2. Search results article selection methodology
